From the Bon Pastor Laboratory (T.C., J.M.N.), Direcció Primària (DAP) Sant Andreu, Barcelona; and the Quality Assurance and Applications Laboratory (QA&AL) Department (L.B., L.A.), A. Menarini Diagnostics, S. Adrià del Besòs, Spain.

Address correspondence to Josep Maria Navarro, MD, Laboratori Bon Pastor, DAP Sant Andreu, Mollersa s/n 08030, Barcelona, Spain.

## References

1. Nakashima K, Nishizaki O, Andoh Y: Acceleration of hemoglobin glycation with aging. *Clin Chim Acta* 214:111–118, 1993
2. Hashimoto Y, Futamura A, Ikushima M: Effect of aging on HbA<sub>1c</sub> in a working male Japanese population. *Diabetes Care* 18:1337–1340, 1995
3. Yang YC, Lu FH, Wu JS, Chang CJ: Age and sex effects on HbA<sub>1c</sub>: a study in a healthy Chinese population. *Diabetes Care* 20:988–991, 1997
4. Carrera T, Bonamusa L, Perich C, Juve R, Coscolluela R, Almirall L, Navarro JM: Effect of aging on HbA<sub>1c</sub> reference values determined by HPLC in an HA-8140 system (Abstract). *Clin Chem* 43 (Suppl. 6):S138, 1997

## Vanadyl Sulfate Does Not Enhance Insulin Action in Patients With Type 1 Diabetes

Vanadium, a transition metal found in trace concentrations in humans, has insulin-like effects in vitro (1–3) and in vivo (4,5). In vitro, vanadium stimulates glucose uptake and oxidation, and glycogen synthesis in adipocytes, skeletal muscle, and hepatocytes (6). In diabetic rats, large doses of vanadium improve glucose tolerance without an increase in plasma insulin (5) and cause an increase in hepatic glycogen (5,7,8). Thus, interest in vanadium as a possible treatment for diabetes has been intense.

In humans, we have demonstrated that low doses of vanadyl sulfate (VS) given for 3 weeks increased insulin-mediated glucose uptake, glycogen synthesis, and suppression of endogenous glucose production (EGP) in type 2 diabetic patients (9) but not in obese nondiabetic subjects (10). These improvements in hepatic and peripheral insulin sensitivity were associated with reduced lipid oxidation rates and plasma free fatty acid (FFA) concentrations. On the other hand, a recent study in

type 1 diabetic patients given sodium metavanadate demonstrated a decrease in insulin requirements with no change in glucose metabolism (11). However, the relationship between the clinical findings of reduced insulin requirements and vanadium action per se is unclear. For example, the intracellular—and hence active—form of vanadium associated with an insulin-like effect is the vanadyl (V<sup>4+</sup>) oxidation state of the element, as used in our previous studies, not vanadate (V<sup>5+</sup>) (12,13). Thus, a plausible mechanism for vanadium action in type 1 diabetes remains unclear.

Because the effects of VS in type 2 diabetes may be to augment insulin action on lipolysis and EGP and both parameters are very sensitive to insulin in vivo, we used a low-dose insulin infusion to determine whether there is enhancement of insulin action, as seen in patients with type 2 diabetes. VS (100 mg/day) was given for 3 weeks and compared with 3 weeks of placebo in five type 1 diabetic subjects (age 31 ± 2 years; BMI 24 ± 1.6 kg/m<sup>2</sup>). Plasma vanadium concentrations were 83.0 ± 29.4 µg/l after VS. There were no changes in insulin dose, weight, or appetite during the study period. While HbA<sub>1c</sub> declined slightly, from 8.1 ± 0.4 to 7.6 ± 0.3%, serum fructosamine levels were unchanged (2.5 ± 0.1 mmol/l after both placebo and VS). Euglycemic-hyperinsulinemic clamps combined with 3-[<sup>3</sup>H]glucose and constant specific activity were performed after each 3-week period. Glucose disposal was unchanged (26.37 ± 3.16 vs. 23.59 ± 3.89 µmol · kg<sup>-1</sup> · min<sup>-1</sup>, placebo vs. VS, respectively, NS). Similarly, glucose infusion rates needed to maintain euglycemia were unchanged (24.53 ± 3.28 vs. 21.59 ± 3.28 µmol · kg<sup>-1</sup> · min<sup>-1</sup>, NS). With indirect calorimetry, there were no significant changes in the whole-body oxidation rates of glucose or lipid. Finally, insulin-induced suppression of EGP (by ~70–80%) and plasma FFA (by ~50–60%) were comparable after placebo and VS.

Thus, a dose of VS previously determined to be well tolerated in humans and effective in patients with insulin-resistant type 2 diabetes did not enhance the effects of physiologic hyperinsulinemia on glucose and fat metabolism in type 1 diabetes. These results suggest that vanadium improves insulin action selectively in subjects with insulin resistance. While currently available, vanadium compounds remain as experimental probes to examine the mechanism of altered insulin action

(14); more studies will be needed to establish any role for their clinical usage.

YIGAL AHARON, MD  
MICHELE MEVORACH, MD  
HARRY SHAMOON, MD

From the Diabetes Research Center, Albert Einstein College of Medicine, Bronx, New York.

Address correspondence to Harry Shamoan, MD, Diabetes Research Center, Albert Einstein College of Medicine, 1300 Morris Park Ave., Bronx, NY 10461. E-mail: shamoan@aecom.yu.edu.

## References

1. Dubyak GR, Kleinzeller G: The insulin-mimetic effects of vanadate in isolated rat adipocytes. *J Biol Chem* 255:5306–5312, 1980
2. Shechter Y: Insulin-mimetic effects of vanadate: possible implications for future treatment of diabetes. *Diabetes* 39:1–5, 1990
3. Clausen T, Anderson TL, Sturup-Johansen M, Petkova A: The relationship between the transport of glucose and cations across cell membranes in isolated tissues: the effect of vanadate in <sup>45</sup>Ca-efflux and sugar transport in adipose tissue and in skeletal muscle. *Biochim Biophys Acta* 646:261–267, 1981
4. Rossetti L, Laughlin MR: Correction of chronic hyperglycemia with vanadate but not with phlorizin normalizes in vitro glycogen synthase activity in diabetic skeletal muscle. *J Clin Invest* 84:892–899, 1989
5. Brichard SM, Okitolonda W, Henquin JC: Long term improvement of glucose homeostasis by vanadate treatment in diabetic rats. *Endocrinology* 123:2048–2053, 1988
6. Tolman EL, Barris E, Burns M, Pansini A, Partridge R: Effects of vanadium on glucose metabolism in vitro. *Life Sci* 25:1159–1164, 1979
7. Pugazhenth S, Khandelwala RL: Insulinlike effects of vanadate on hepatic glycogen metabolism in nondiabetic and streptozotocin-induced diabetic rats. *Diabetes* 39:821–827, 1990
8. Battell ML, Yuen VG, McNeill JH: Treatment of BB rats with vanadyl sulphate. *Pharm Comm* 1:291–301, 1992
9. Cohen N, Halberstam M, Shlimovich P, Chang CJ, Shamoan H, Rossetti L: Oral vanadyl sulfate improves hepatic and peripheral insulin sensitivity in patients with noninsulin dependent diabetes mellitus. *J Clin Invest* 95:2501–2509, 1995
10. Halberstam M, Cohen N, Shlimovich P, Rossetti L, Shamoan H: Oral vanadyl sulfate improves insulin sensitivity in NIDDM but not in obese nondiabetic subjects. *Diabetes* 45:659–666, 1996
11. Goldfine AB, Simonson DC, Folli F, Patti ME, Kahn CR: Metabolic effects of sodium metavanadate in humans with insulin-

dependent and noninsulin-dependent diabetes mellitus: in vivo and in vitro studies. *J Clin Endocrinol Metab* 80:3312–3320, 1995

12. Gegani H, Gichin M, Karlsh S, Shechter Y: Electron paramagnetic resonance studies and insulin-like effects of vanadium in rat adipocytes. *Biochemistry* 20:5795–5799, 1981
13. Green A: The insulin-like effect of sodium vanadate on adipocyte glucose transport is mediated at a post-insulin-receptor level. *Biochem J* 238:663–669, 1986
14. Goldfine A, Landaker EJ, Willsky G, Patti ME: Defining the mechanism of action of vanadium in vivo in NIDDM (Abstract). *Diabetes* 47 (Suppl. 1):A307, 1998

## A Common Glu<sup>298</sup>→Asp (894G→T) Mutation at Exon 7 of the Endothelial Nitric Oxide Synthase Gene and Vascular Complications in Type 2 Diabetes

Nitric oxide (NO) regulates endothelium-dependent vasodilatation and blood pressure, and reduced production has been implicated in hypertension, atherosclerosis, and diabetes (1–3). Endothelial constitutive nitric oxide synthase (ecNOS) mediates the oxidation of L-arginine to produce NO and determines basal vascular wall NO production (4). The gene encoding ecNOS is located on chromosome 7q35–36 and comprises 26 exons (5). To identify genetic markers relevant to NO-related vascular risk, we explored in 574 middle-aged Australian type 2 diabetic patients a possible role for a Glu<sup>298</sup>→Asp mutation at exon 7 of the ecNOS gene; an association between the mutation and coronary risk was reported in the Cambridge Heart Anti-Oxidant Study (6). Patients recruited were those aged 62.4 ± 0.5 years (mean ± SEM), 329 men and 245 women, with and without documented macro- and microvascular complications. The genotype distribution was 7.5, 40.6, and 51.9% for TT, TG, and GG, respectively. It was in Hardy-Weinberg equilibrium ( $\chi^2 = 0.088$ ,  $P > 0.05$ ) and not different between men and women ( $\chi^2 = 0.713$ ,  $P = 0.700$ ). The

**Table 1—Vascular complications and the ecNOS genotypes in type 2 diabetes**

|                             | TT        | TG        | GG        | P value |
|-----------------------------|-----------|-----------|-----------|---------|
| Angina pectoris             |           |           |           |         |
| Yes                         | 11 (25.6) | 40 (17.2) | 40 (13.4) | 0.095   |
| No                          | 33        | 192       | 258       |         |
| Myocardial infarction       |           |           |           |         |
| Yes                         | 6 (14.0)  | 35 (15.1) | 54 (18.1) | 0.577   |
| No                          | 37        | 197       | 244       |         |
| Stroke                      |           |           |           |         |
| Yes                         | 1 (2.6)   | 7 (3.6)   | 10 (3.9)  | 0.913   |
| No                          | 38        | 187       | 245       |         |
| Peripheral vascular disease |           |           |           |         |
| Yes                         | 5 (12.8)  | 41 (21.1) | 51 (20.0) | 0.493   |
| No                          | 34        | 153       | 204       |         |
| Microalbuminuria            |           |           |           |         |
| Yes                         | 7 (20.6)  | 44 (28.8) | 65 (30.5) | 0.305   |
| No                          | 27        | 109       | 148       |         |
| Retinopathy                 |           |           |           |         |
| Yes                         | 5 (20.8)  | 23 (16.8) | 43 (26.7) | 0.119   |
| No                          | 19        | 114       | 118       |         |
| Neuropathy                  |           |           |           |         |
| Yes                         | 8 (21.1)  | 46 (26.0) | 49 (21.1) | 0.488   |
| No                          | 30        | 131       | 183       |         |

Data are n or n (%). P values refer to comparisons of the frequencies of the occurrence of vascular complications among the three ecNOS genotypes by  $\chi^2$  analysis.

ecNOS TT and TG genotypes were not associated with age, age at onset of documented diabetes, BMI, systolic and diastolic blood pressures (BPs), lipid profile, plasma creatinine and glycosylated hemoglobin (HbA<sub>1c</sub>) levels, or urinary albumin index (UAI: albumin/creatinine ratio). Furthermore, as shown in Table 1, in  $\chi^2$  comparisons, the mutation was not associated with vascular events ( $\chi^2 = 4.698$ ,  $P = 0.095$  for angina pectoris;  $\chi^2 = 1.100$ ,  $P = 0.577$  for myocardial infarction;  $\chi^2 = 0.181$ ,  $P = 0.913$  for stroke;  $\chi^2 = 1.414$ ,  $P = 0.493$  for peripheral vascular disease;  $\chi^2 = 2.372$ ,  $P = 0.305$  for microalbuminuria;  $\chi^2 = 1.434$ ,  $P = 0.488$  for neuropathy; and  $\chi^2 = 4.260$ ,  $P = 0.119$  for retinopathy). In a logistic regression analysis, in which vascular events were entered as dependent variables and age, sex, BMI, current smoking status, systolic and diastolic BPs, total cholesterol, triglycerides, HDL cholesterol, HbA<sub>1c</sub>, and UAI were entered as independent variables, the ecNOS TT and TG genotypes were still not predictive of the occurrence of vascular events.

In conclusion, we identified a 27.8% allele frequency of the Glu<sup>298</sup>→Asp mutation at exon 7 of the ecNOS gene in type 2 diabetic patients, but in these patients the mutation was not associated with macro-

or microvascular complications or with any of the traditional atherogenic risk factors.

HUA CAI, MBBS

XINGLI WANG, MBBS, PHD

STEPHEN COLAGIURI, MD, FRACP

DAVID E.L. WILCKEN, MD, FRCP, FRACP

From the Cardiovascular Genetics Laboratory (H.C., X.W., D.E.L.W.) and the Diabetes Centre (S.C.), Prince of Wales Hospital, Randwick, New South Wales, Australia.

Address correspondence to Prof. David E.L. Wilcken, Cardiovascular Genetics Laboratory, Ground Floor, South Wing, Edmund Blacket Building, Prince of Wales Hospital, Randwick, NSW, Australia, 2031. E-mail: d.wilcken@unsw.edu.au.

### References

1. Tikkanen I, Fyhrquist F: Nitric oxide in hypertension and renal diseases. *Ann Med* 27:353–357, 1995
2. Gryglewski RJ, Chlopicki S, Swies J, Niezabitowski P: Prostacyclin, nitric oxide, and atherosclerosis. *Ann NY Acad Sci* 758:194–206, 1995
3. Williams SB, Cusco JA, Roddy MA, Johnstone MT, Creager MA: Impaired nitric oxide mediated vasodilatation in patients with non-insulin dependent diabetes mellitus. *J Am Coll Cardiol* 27:567–574, 1996
4. Cooke JP, Dzau VJ: Nitric oxide synthase: role in the genesis of vascular disease. *Ann*
